# Supplementary material for: Targeted Inhibition of the miR‐199a/214 Cluster by CRISPR Interference Augments the Tumor Tropism of Human Induced Pluripotent Stem Cell‐Derived Neural Stem Cells under Hypoxic Condition
Source: Hindawi journal article supplement (doi:10.1155/2016/3598542), 2016-01-01
Supplement: f1 [file 3598542.f1.pdf]

**Supplementary Table 1. qPCR primers**

| Genes           | Primer Sequence                                                        |
|-----------------|------------------------------------------------------------------------|
| hsa-miR-199a-5p | F: 5'-CCCAGTGTTTCAGACTACCTGTTCAAA-3'                                   |
| hsa-miR-199a-3p | F: 5'-ACAGTAGTCTGCACATTGGTTAAAA-3'                                     |
| hsa-miR-214     | F: 5'-ACAGCAGGCACAGACAGGCAGTAAA-3'                                     |
| cel-LIN-4       | F: 5'-TCCCTGAGACCTCAAGTGTGAAAA-3'                                      |
| HIF1A           | F: 5'-ACAGCAGCCAGACGATCATGC-3'<br>R: 5'-GCAGTAGGTTTCTGCTGCCTTGT-3'     |
| MET             | F: 5'-CCAAATCTTTTATTAGTGGTGGGAGCA-3'<br>R: 5'-GCTGTTGCAGGGAAGGAGTGG-3' |
| MAPK1           | F: 5'-GCGCGGGCCCGGAGATGGTC-3'<br>R: 5'-TGAAGCGCAGTAAGATTTTT-3'         |
| CXCR4           | F: 5'-CGCATCTGGAGAACCAGCGG-3'<br>R: 5'-GAGGTCGGCCACTGACAGGT-3'         |
| GAPDH           | F: 5'-TGCACCACCAACTGCTTAGC-3'<br>R: 5'-GGCATGGACTGTGGTCATGAG-3'        |

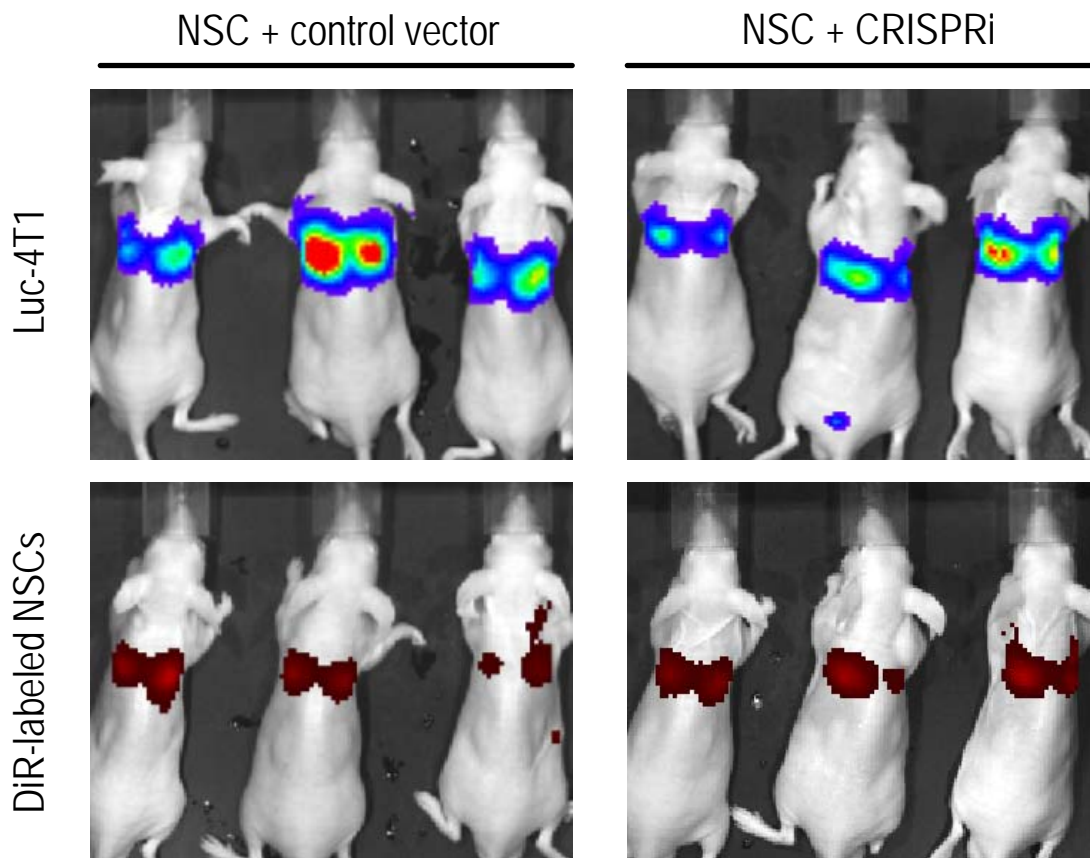

Supplementary Figure 1: Whole body images showing the presence of luc-4T1 tumor and DiR-labeled NSCs in mice. The luminescent images show luc-4T1 tumor formation. The fluorescent images show the presence of NSCs.

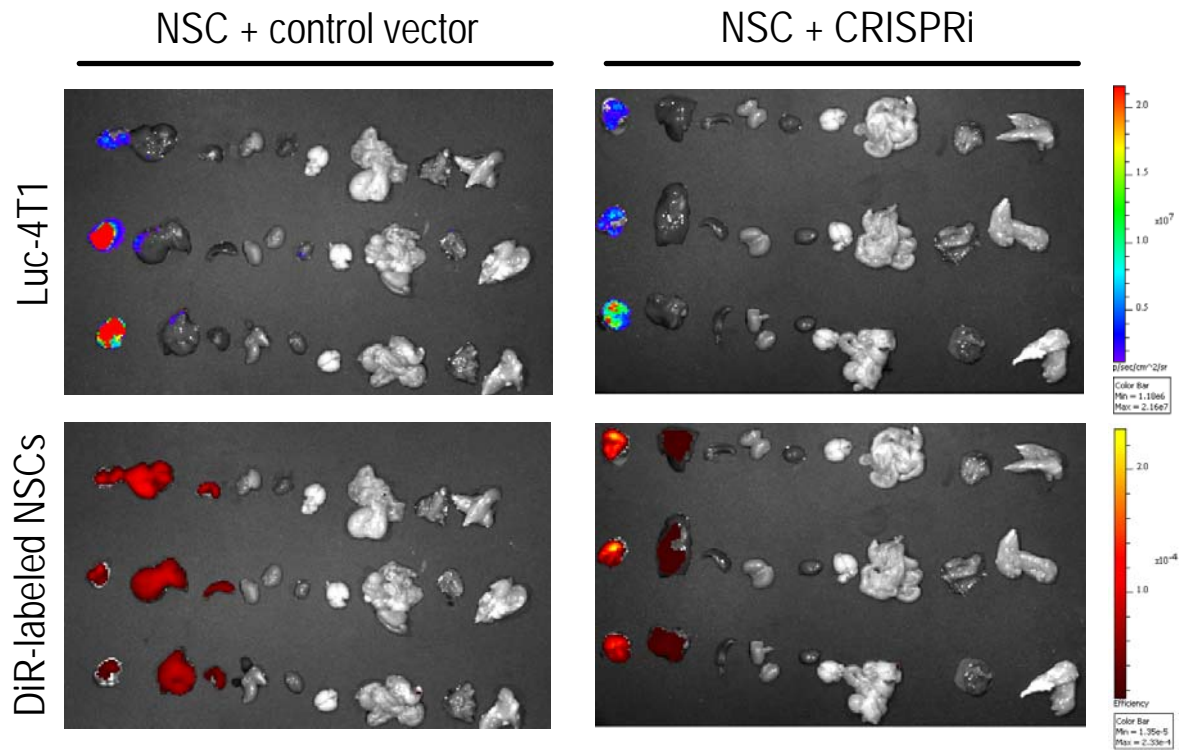

**Supplementary Figure 2: Ex vivo organs images showing the tumor tropism of NSCs in mice.** The luminescent images show luc-4T1 tumor metastases in the lung. The fluorescent images show the organ distribution of NSCs. The organs shown in each panel from left to right: lung, liver, spleen, kidney, heart, brain, stomach, spinal cord and femur.

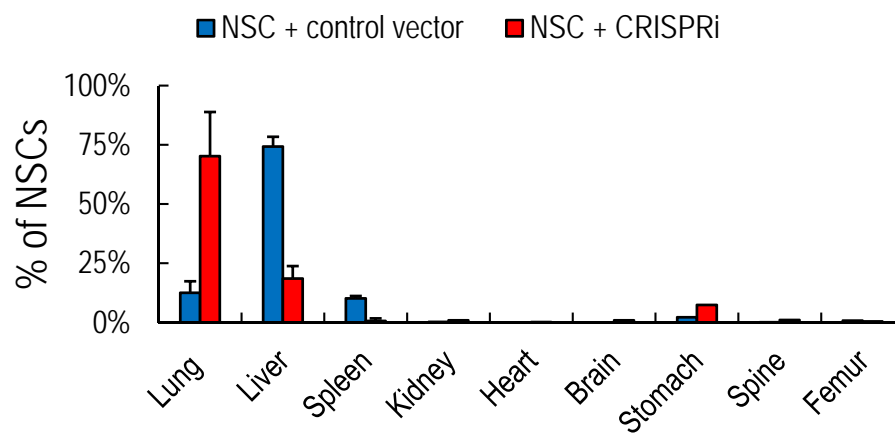

**Supplementary Figure 3: Organ distribution of NSCs.** Histogram showing the percentages of NSCs distributed in different organs (n=3). Error bars: s.d.
